# Supplementary material for: Safety of Same-Eye Subretinal Sequential Readministration of AAV2-hRPE65v2 in Non-human Primates
Source: PubMed Central journal article supplement — Mol Ther Methods Clin Dev. 2019 Sep 3;15:133–48. doi: 10.1016/j.omtm.2019.08.011 (PMC6807311; doi:10.1016/j.omtm.2019.08.011), 2019-09-03
Supplement: mmc1.pdf [file mmc1.pdf]

**OMTM, Volume 15**

**Supplemental Information**

**Safety of Same-Eye Subretinal**

**Sequential Readministration**

**of *AAV2-hRPE65v2* in Non-human Primates**

**Lindsey Weed, Michael J. Ammar, Shangzhen Zhou, Zhangyong Wei, Leona W. Serrano, Junwei Sun, Vivian Lee, Albert M. Maguire, Jean Bennett, and Tomas S. Aleman**

## Supplementary Figures

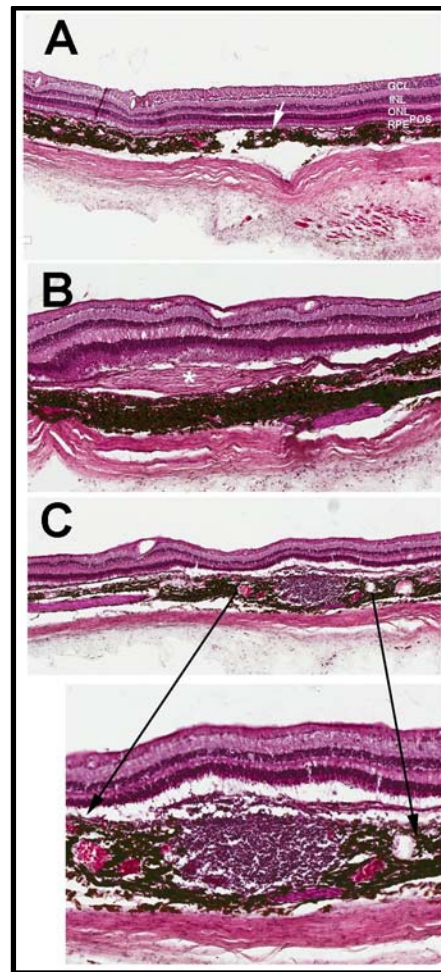

**Fig. S1.** Examples of focal and rare histopathologic findings. Shown are hematoxylin and eosin-stained cryosections from the right retina of 11D086. (A) There is a focal break in the RPE layer (arrow) coinciding with shortening of outer segments. B) Fibrinoid scar (\*) is present in the subretinal space; (C) focal collection of monocytes in the choroid, extending towards subretinal space. The RPE is missing in this area. Inset shows a higher magnification view of this area. GCL, ganglion cell layer; INL, inner nuclear layer; ONL, outer nuclear layer; POS, photoreceptor outer segment; RPE, retinal pigmented epithelium.

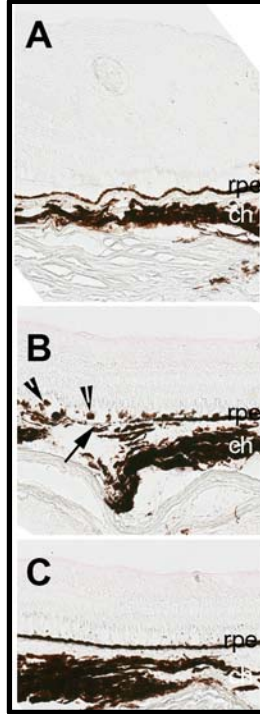

**Fig. S2.** Representative RPE65 immunohistochemistry results after ipsilateral subretinal readministration in a non-human primate (BF54F) in (A) injection region #1, (B) overlapping injection region, and (C) on injection region #2. (B) Arrowheads, dislodged RPE cells; arrow, atrophic retinal pigmented epithelium (RPE) cells; ch, choroid

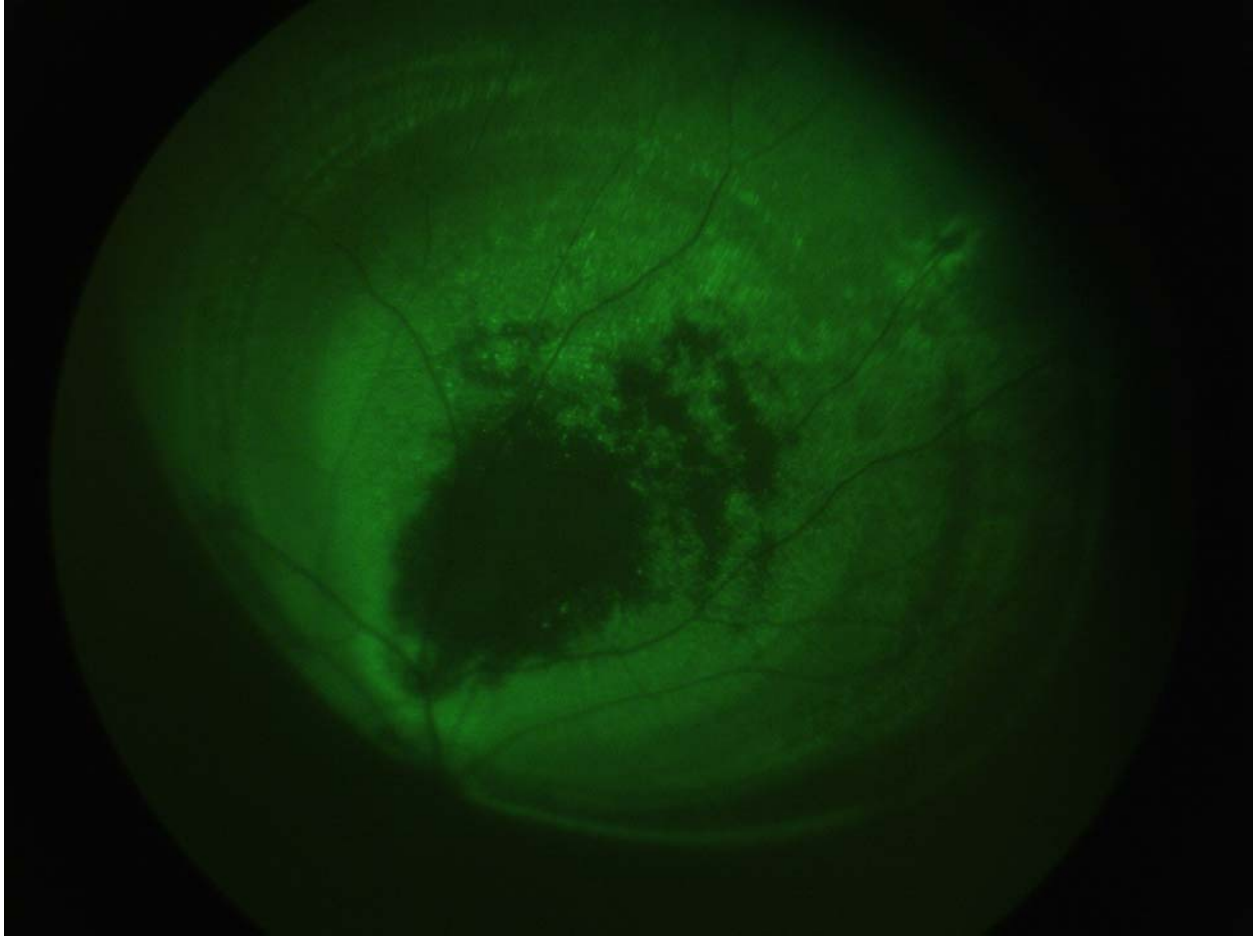

**Fig. S3.** Example of contour map-like appearance effect documented by imaging with a RetCam equipped with fluorescein filters after subretinal injection of AAV.EGFP in a NHP. This animal had received a subretinal injection of  $1E11$ vg of a tyrosine-mutant AAV (AAV2TYF) carrying CVM-driven enhanced green fluorescent protein (EGFP) three months earlier. The image shows EGFP fluorescence occupying the region exposed to the AAV. A ringlike pattern is detected surrounding a black-appearing center of the bleb.
